# Supplementary material for: Development and validation of a sample-to-result real time multiplex RT-PCR test for Human African Trypanosomiasis and acute febrile illnesses caused by dengue, chikungunya and yellow fever viruses in DRC
Source: Research Square preprint supplement (doi:10.21203/rs.3.rs-6964643/v1), 2025-07-31
Supplement: Supplementary file 1 [file ed3bae4a2b21979619b8fb8a.docx]

# Supplementary Data

| Pathogen strain | Part of the sequence aligned with the primers and probe |
| --- | --- |
| ECSA: CHIKV NC_004162.2 S27 African prototype | 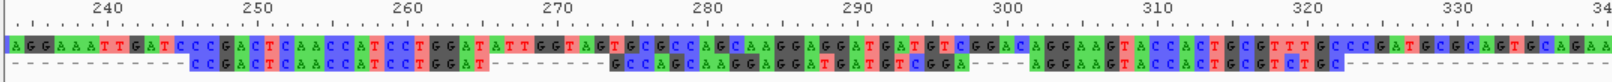 |
| CHIKV SII CHIKV Probe CHIKV ASII |
| ECSA: CHIKV NC_004162.2 S27 African prototype | 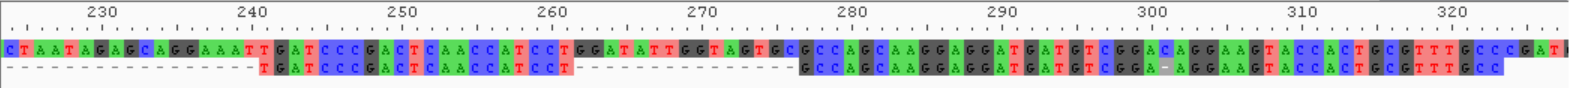 |
| CHIKV SI CHIKV Probe CHIKV ASI |
| West African: HM045811.1 CHIKV | 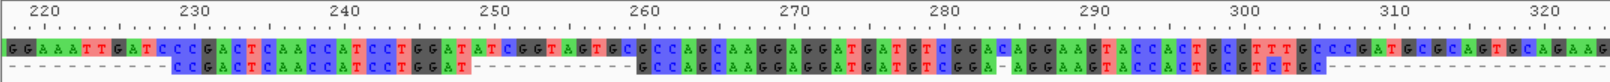 |
| CHIKV SII CHIKV Probe CHIKV ASII |
| West African: HM045811.1 CHIKV | 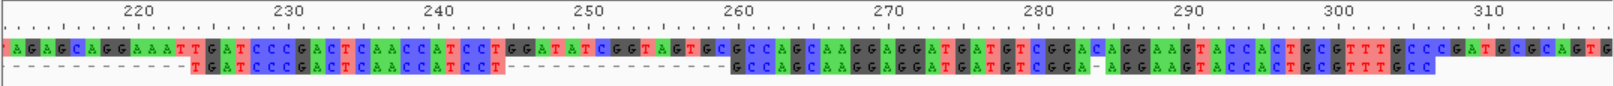 |
| CHIKV SI CHIKV Probe CHIKV ASI |
| Asian: CHIKV EU703759.1 MY002IMR/06/BP | 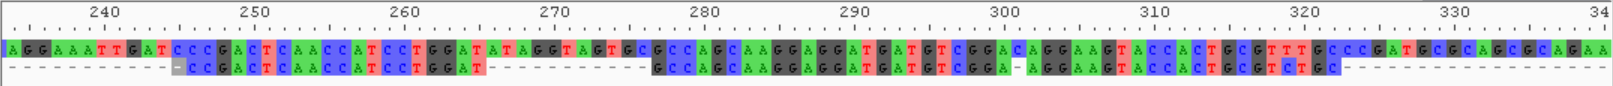 |
| CHIKV SII CHIKV Probe CHIKV ASII |
| Asian: CHIKV EU703759.1 MY002IMR/06/BP | 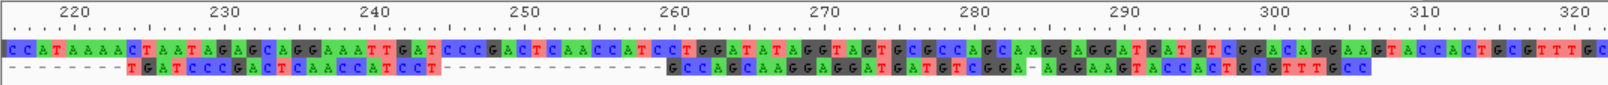 |
| CHIKV SI CHIKV Probe CHIKV ASI |
| YFV: NC_002031.1 | 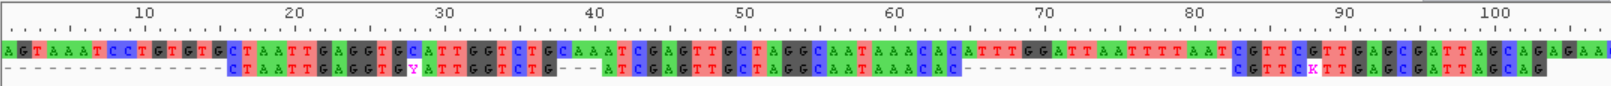 |
| YFV_For YFV_Probe YFV_Rev |
| DENV1:  NC_001477.1 | 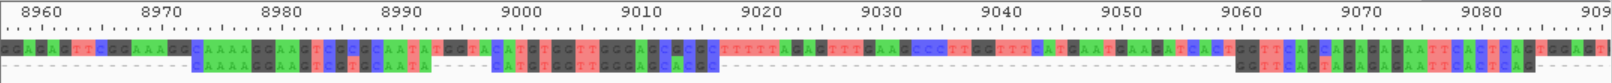 |
| DENV1_For DENV1_Probe DENV1_Rev |
| DENV1:  NC_001477.1 | 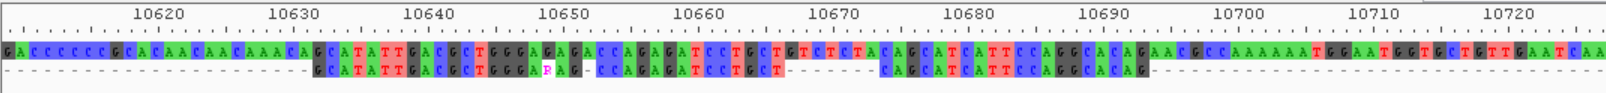 |
| panDENV_For panDENV_Probe panDENV Rev1 |
| DENV2:  NC_001474.2 | 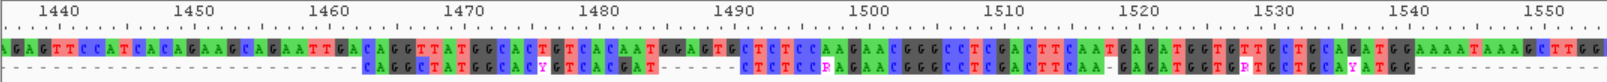 |
| DENV2_For DENV2_Probe DENV2_Rev |
| DENV2:  NC_001474.2 | 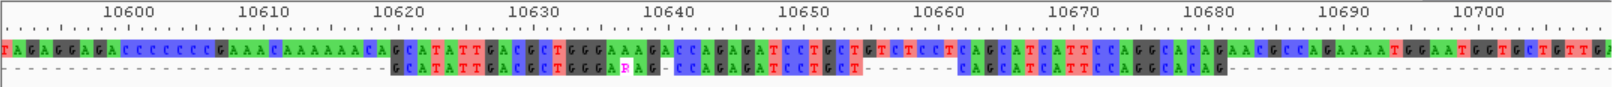 |
| panDENV_For panDENV_Probe panDENV Rev1 |
| DENV3:  NC_001475.2 | 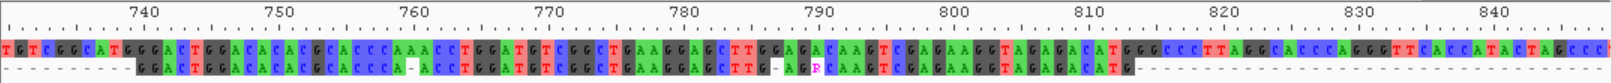 |
| DENV2_For DENV2_Probe DENV2_Rev |
| DENV3:  NC_001475.2 | 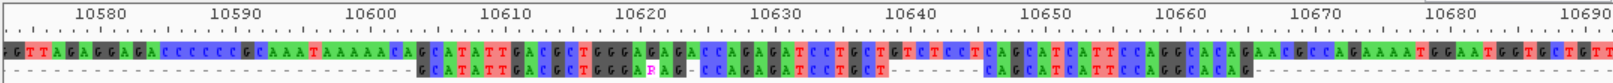 |
| panDENV_For panDENV_Probe panDENV Rev1 |
| DENV4:  NC_002640.1 | 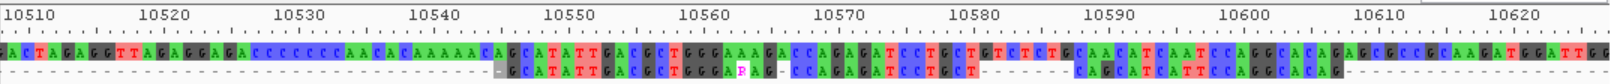 |
| panDENV_For panDENV_Probe panDENV Rev1 |

Supplementary table 1: Alignments of reference genomes with the primers and probes of the HAT-ARBO multiplex PCR for the arboviral targets.

| **Virus** | **Strain reference** |
| --- | --- |
| YFV ASIBI | Yellow Fever Virus ASIBI |
| CHIKV | Isolated from patient material at the clinical laboratory of ITM, country of origin Surinam |
| CHIKV | Isolated from patient material at the clinical laboratory of ITM , country of origin Aruba |
| CHIKV | Isolated from patient material at the clinical laboratory of ITM , country of origin Aruba |
| CHIKV | Isolated from patient material at the clinical laboratory of ITM , country of origin Aruba |
| CHIKV | Isolated from patient material at the clinical laboratory of ITM , country of origin Aruba |
| CHIKV | Isolated from patient material at the clinical laboratory of ITM , country of origin Aruba |
| CHIKV | Isolated from patient material at the clinical laboratory of ITM , country of origin Aruba |
| CHIKV | Isolated from patient material at the clinical laboratory of ITM , country of origin Aruba |
| CHIKV | Isolated from patient material at the clinical laboratory of ITM , country of origin Aruba |
| CHIKV | Isolated from patient material at the clinical laboratory of ITM |
| CHIKV | Isolated from patient material at the clinical laboratory of ITM , country of origin Aruba |
| DENV1 | D1_Indonesia (isolated from patient material at the clinical laboratory of ITM , country of origin Indonesia) |
| DENV2 | D2_Myanmar (isolated from patient material at the clinical laboratory of ITM, country of origin Myanmar) |
| DENV3 | D3_Thailand (isolated from patient material at the clinical laboratory of ITM, country of origin Thailand) |
| DENV3 | D3_X (Isolated from patient material at the clinical laboratory of ITM) |
| DENV4 | D4_Thailand (isolated from patient material at the clinical laboratory of ITM , country of origin Thailand) |
| DENV4 | D4_X (Isolated from patient material at the clinical laboratory of ITM) |
| USUV | Usutu Virus (from Bernhard-Nocht-Institut für Tropenmedizin Hamburg) |
| RSSEV | Russian Spring-Summer encephalitis virus ASIBI (RKI reference strain) |
| SLEV | St. Louis Encephalitis Virus (ATCC VR-1265  (RKI, Germany) |
| TBEV | Tick-borne Encephalitis Hypr (received from PHI) |
| TBEV | TBEV Neudörfl |
| TOSV | Toscana Virus (PHE 0903291v) |
| SFSV | Sandfly Fever Sicilian Virus (PHE 0903291v) |
| SFNV | Sandfly Fever Napels Virus (PHE 0003053v) |
| RRV | Ross River Virus (NCPV-PHE: 0005281v) |
| SINV | Sindbis Virus (NCPV-PHE: 0007163v) |
| VEEV | Venezuelan Equine Encephalatis Virus strain 78v (NCPV-PHE: 0605159v) |
| VEEV | Venezuelan Equine Encephalatis Virus strain TrD (NCPV-PHE: 0605152v) |
| EEEV | Eastern Equine Encephalatis Virus (NCPV-PHE: 0407041v) |
| WEEV | Western Equine Encephalatis Virus (NCPV-PHE: 0407043v) |
| RVFV | Rift Valley Fever Virus ITG (NCPV-PHE: 1202191v) |
| MAYV | Mayaro virus (NCPV-PHE: 0906281v) |
| WNV | West Nile Virus strain 385-99, lineage I (BEI NR_72) |
| ZIKV | ZIKV_DutchAntilles (Isolated from patient material at the clinical laboratory of ITM , from Dutch Antilles) |
| ZIKV | ZIKV_MR766 (Isolated from patient material at the clinical laboratory of ITM, from Uganda) |
| ZIKV | ZIKV_Belize (Isolated from patient material at the clinical laboratory of ITM, from Belize) |
| L. chagasi | ECCha7 |
| Leishmania |  |

Supplementary table 2: Virus strains used for extraction of nucleic acids and testing of analytical specificity
